# Supplementary material for: A New Measure for the Assessment of Student–Teacher Connectedness in Adolescence
Source: Atypon-hosted journal article supplement (doi:10.1027/1015-5759/a000621), 2020-12-01
Supplement: 1015-5759_a000621_esm1.pdf [file 1015-5759_a000621_esm1.pdf]

Mplus VERSION 8.3  
MUTHEN & MUTHEN  
06/10/2020 1:08 PM

#### INPUT INSTRUCTIONS

title: TITLE: Inter-item and item-total correlation (adjusted)  
for ordinal items (polychoric correlations)  
England, prueba para todos los totales corregidos

data: file = EnglandCCFA.dat;  
listwise = on;

variable: names = TC1 TC2 TC3 TC4 TC5 TC6 TC7 TC8 TC9 TC10 TC11 TC12 TC13 TC14  
TC15;

categorical = TC1-TC15;  
usevariable = TC1-TC15 Tot1 Tot2 Tot3 Tot4 Tot5 Tot6 Tot7 Tot8 Tot9;  
usevariable = Tot10 Tot11 Tot12 Tot13 Tot14 Tot15;  
!this line is to obtain polyserial correlations  
!note that TotX is included  
!TotX is the sum score of all items except item X  
missing = all(999);

define: Tot1 = TC2+TC3+TC4+TC5+TC6+TC7+TC8+TC9+TC10+TC11+TC12+TC13+TC14+TC15;  
Tot2 = TC1+TC3+TC4+TC5+TC6+TC7+TC8+TC9+TC10+TC11+TC12+TC13+TC14+TC15;  
Tot3 = TC1+TC2+TC4+TC5+TC6+TC7+TC8+TC9+TC10+TC11+TC12+TC13+TC14+TC15;  
Tot4 = TC1+TC2+TC3+TC5+TC6+TC7+TC8+TC9+TC10+TC11+TC12+TC13+TC14+TC15;  
Tot5 = TC1+TC2+TC3+TC4+TC6+TC7+TC8+TC9+TC10+TC11+TC12+TC13+TC14+TC15;  
Tot6 = TC1+TC2+TC3+TC4+TC5+TC7+TC8+TC9+TC10+TC11+TC12+TC13+TC14+TC15;  
Tot7 = TC1+TC2+TC3+TC4+TC5+TC6+TC8+TC9+TC10+TC11+TC12+TC13+TC14+TC15;  
Tot8 = TC1+TC2+TC3+TC4+TC5+TC6+TC7+TC9+TC10+TC11+TC12+TC13+TC14+TC15;  
Tot9 = TC1+TC2+TC3+TC4+TC5+TC6+TC7+TC8+TC10+TC11+TC12+TC13+TC14+TC15;  
Tot10 = TC1+TC2+TC3+TC4+TC5+TC6+TC7+TC8+TC9+TC11+TC12+TC13+TC14+TC15;  
Tot11 = TC1+TC2+TC3+TC4+TC5+TC6+TC7+TC8+TC9+TC10+TC12+TC13+TC14+TC15;  
Tot12 = TC1+TC2+TC3+TC4+TC5+TC6+TC7+TC8+TC9+TC10+TC11+TC13+TC14+TC15;  
Tot13 = TC1+TC2+TC3+TC4+TC5+TC6+TC7+TC8+TC9+TC10+TC11+TC12+TC14+TC15;  
Tot14 = TC1+TC2+TC3+TC4+TC5+TC6+TC7+TC8+TC9+TC10+TC11+TC12+TC13+TC15;  
Tot15 = TC1+TC2+TC3+TC4+TC5+TC6+TC7+TC8+TC9+TC10+TC11+TC12+TC13+TC14;  
! TotX to be used for the adjusted item-total correlation for TCX

analysis: type = basic;

INPUT READING TERMINATED NORMALLY

TITLE: Inter-item and item-total correlation (adjusted)  
for ordinal items (polychoric correlations)  
England, prueba para todos los totales corregidos

SUMMARY OF ANALYSIS

|                        |      |
|------------------------|------|
| Number of groups       | 1    |
| Number of observations | 1516 |

|                                       |    |
|---------------------------------------|----|
| Number of dependent variables         | 30 |
| Number of independent variables       | 0  |
| Number of continuous latent variables | 0  |

Observed dependent variables

Continuous

|       |       |       |       |       |       |
|-------|-------|-------|-------|-------|-------|
| TOT1  | TOT2  | TOT3  | TOT4  | TOT5  | TOT6  |
| TOT7  | TOT8  | TOT9  | TOT10 | TOT11 | TOT12 |
| TOT13 | TOT14 | TOT15 |       |       |       |

Binary and ordered categorical (ordinal)

|      |      |      |      |      |      |
|------|------|------|------|------|------|
| TC1  | TC2  | TC3  | TC4  | TC5  | TC6  |
| TC7  | TC8  | TC9  | TC10 | TC11 | TC12 |
| TC13 | TC14 | TC15 |      |      |      |

|                                               |           |
|-----------------------------------------------|-----------|
| Estimator                                     | WLSMV     |
| Maximum number of iterations                  | 1000      |
| Convergence criterion                         | 0.500D-04 |
| Maximum number of steepest descent iterations | 20        |
| Parameterization                              | DELTA     |
| Link                                          | PROBIT    |

Input data file(s)  
EnglandCCFA.dat

Input data format FREE

# UNIVARIATE PROPORTIONS AND COUNTS FOR CATEGORICAL VARIABLES

TC1

|            |       |         |
|------------|-------|---------|
| Category 1 | 0.123 | 186.000 |
| Category 2 | 0.139 | 210.000 |
| Category 3 | 0.459 | 696.000 |
| Category 4 | 0.280 | 424.000 |

TC2

|            |       |         |
|------------|-------|---------|
| Category 1 | 0.082 | 125.000 |
| Category 2 | 0.092 | 139.000 |
| Category 3 | 0.441 | 669.000 |
| Category 4 | 0.385 | 583.000 |

TC3

|            |       |          |
|------------|-------|----------|
| Category 1 | 0.053 | 80.000   |
| Category 2 | 0.030 | 45.000   |
| Category 3 | 0.133 | 202.000  |
| Category 4 | 0.784 | 1189.000 |

TC4

|            |       |         |
|------------|-------|---------|
| Category 1 | 0.080 | 121.000 |
| Category 2 | 0.137 | 207.000 |
| Category 3 | 0.383 | 581.000 |

|            |       |         |
|------------|-------|---------|
| Category 4 | 0.400 | 607.000 |
| TC5        |       |         |
| Category 1 | 0.163 | 247.000 |
| Category 2 | 0.235 | 357.000 |
| Category 3 | 0.347 | 526.000 |
| Category 4 | 0.255 | 386.000 |
| TC6        |       |         |
| Category 1 | 0.108 | 163.000 |
| Category 2 | 0.160 | 243.000 |
| Category 3 | 0.443 | 671.000 |
| Category 4 | 0.290 | 439.000 |
| TC7        |       |         |
| Category 1 | 0.155 | 235.000 |
| Category 2 | 0.203 | 307.000 |
| Category 3 | 0.396 | 600.000 |
| Category 4 | 0.247 | 374.000 |
| TC8        |       |         |
| Category 1 | 0.152 | 231.000 |
| Category 2 | 0.201 | 304.000 |
| Category 3 | 0.408 | 618.000 |
| Category 4 | 0.239 | 363.000 |
| TC9        |       |         |
| Category 1 | 0.152 | 230.000 |
| Category 2 | 0.162 | 246.000 |
| Category 3 | 0.400 | 606.000 |
| Category 4 | 0.286 | 434.000 |
| TC10       |       |         |
| Category 1 | 0.129 | 195.000 |
| Category 2 | 0.162 | 245.000 |
| Category 3 | 0.402 | 609.000 |
| Category 4 | 0.308 | 467.000 |
| TC11       |       |         |
| Category 1 | 0.090 | 137.000 |
| Category 2 | 0.103 | 156.000 |
| Category 3 | 0.424 | 643.000 |
| Category 4 | 0.383 | 580.000 |
| TC12       |       |         |
| Category 1 | 0.106 | 160.000 |
| Category 2 | 0.142 | 216.000 |
| Category 3 | 0.422 | 639.000 |
| Category 4 | 0.330 | 501.000 |
| TC13       |       |         |
| Category 1 | 0.102 | 155.000 |
| Category 2 | 0.127 | 193.000 |
| Category 3 | 0.419 | 635.000 |
| Category 4 | 0.352 | 533.000 |
| TC14       |       |         |
| Category 1 | 0.113 | 172.000 |
| Category 2 | 0.129 | 196.000 |
| Category 3 | 0.429 | 651.000 |
| Category 4 | 0.328 | 497.000 |
| TC15       |       |         |
| Category 1 | 0.125 | 189.000 |
| Category 2 | 0.151 | 229.000 |

|            |       |         |
|------------|-------|---------|
| Category 3 | 0.403 | 611.000 |
| Category 4 | 0.321 | 487.000 |

WARNING: THE SAMPLE CORRELATION OF TOT2 AND TOT1 IS 0.998  
DUE TO ONE OR MORE ZERO CELLS IN THEIR BIVARIATE TABLE.  
INFORMATION FROM THESE VARIABLES CAN BE USED TO CREATE ONE NEW VARIABLE.

WARNING: THE SAMPLE CORRELATION OF TOT3 AND TOT1 IS 0.997  
DUE TO ONE OR MORE ZERO CELLS IN THEIR BIVARIATE TABLE.  
INFORMATION FROM THESE VARIABLES CAN BE USED TO CREATE ONE NEW VARIABLE.

WARNING: THE SAMPLE CORRELATION OF TOT3 AND TOT2 IS 0.998  
DUE TO ONE OR MORE ZERO CELLS IN THEIR BIVARIATE TABLE.  
INFORMATION FROM THESE VARIABLES CAN BE USED TO CREATE ONE NEW VARIABLE.

WARNING: THE SAMPLE CORRELATION OF TOT4 AND TOT1 IS 0.997  
DUE TO ONE OR MORE ZERO CELLS IN THEIR BIVARIATE TABLE.  
INFORMATION FROM THESE VARIABLES CAN BE USED TO CREATE ONE NEW VARIABLE.

WARNING: THE SAMPLE CORRELATION OF TOT4 AND TOT2 IS 0.998  
DUE TO ONE OR MORE ZERO CELLS IN THEIR BIVARIATE TABLE.  
INFORMATION FROM THESE VARIABLES CAN BE USED TO CREATE ONE NEW VARIABLE.

WARNING: THE SAMPLE CORRELATION OF TOT4 AND TOT3 IS 0.997  
DUE TO ONE OR MORE ZERO CELLS IN THEIR BIVARIATE TABLE.  
INFORMATION FROM THESE VARIABLES CAN BE USED TO CREATE ONE NEW VARIABLE.

WARNING: THE SAMPLE CORRELATION OF TOT5 AND TOT1 IS 0.997  
DUE TO ONE OR MORE ZERO CELLS IN THEIR BIVARIATE TABLE.  
INFORMATION FROM THESE VARIABLES CAN BE USED TO CREATE ONE NEW VARIABLE.

WARNING: THE SAMPLE CORRELATION OF TOT5 AND TOT2 IS 0.997  
DUE TO ONE OR MORE ZERO CELLS IN THEIR BIVARIATE TABLE.  
INFORMATION FROM THESE VARIABLES CAN BE USED TO CREATE ONE NEW VARIABLE.

WARNING: THE SAMPLE CORRELATION OF TOT5 AND TOT3 IS 0.996  
DUE TO ONE OR MORE ZERO CELLS IN THEIR BIVARIATE TABLE.  
INFORMATION FROM THESE VARIABLES CAN BE USED TO CREATE ONE NEW VARIABLE.

WARNING: THE SAMPLE CORRELATION OF TOT5 AND TOT4 IS 0.997  
DUE TO ONE OR MORE ZERO CELLS IN THEIR BIVARIATE TABLE.  
INFORMATION FROM THESE VARIABLES CAN BE USED TO CREATE ONE NEW VARIABLE.

WARNING: THE SAMPLE CORRELATION OF TOT6 AND TOT1 IS 0.996  
DUE TO ONE OR MORE ZERO CELLS IN THEIR BIVARIATE TABLE.  
INFORMATION FROM THESE VARIABLES CAN BE USED TO CREATE ONE NEW VARIABLE.

WARNING: THE SAMPLE CORRELATION OF TOT6 AND TOT2 IS 0.997  
DUE TO ONE OR MORE ZERO CELLS IN THEIR BIVARIATE TABLE.  
INFORMATION FROM THESE VARIABLES CAN BE USED TO CREATE ONE NEW VARIABLE.

WARNING: THE SAMPLE CORRELATION OF TOT6 AND TOT3 IS 0.997  
DUE TO ONE OR MORE ZERO CELLS IN THEIR BIVARIATE TABLE.

INFORMATION FROM THESE VARIABLES CAN BE USED TO CREATE ONE NEW VARIABLE.

WARNING: THE SAMPLE CORRELATION OF TOT6 AND TOT4 IS 0.997  
DUE TO ONE OR MORE ZERO CELLS IN THEIR BIVARIATE TABLE.  
INFORMATION FROM THESE VARIABLES CAN BE USED TO CREATE ONE NEW VARIABLE.

WARNING: THE SAMPLE CORRELATION OF TOT6 AND TOT5 IS 0.996  
DUE TO ONE OR MORE ZERO CELLS IN THEIR BIVARIATE TABLE.  
INFORMATION FROM THESE VARIABLES CAN BE USED TO CREATE ONE NEW VARIABLE.

WARNING: THE SAMPLE CORRELATION OF TOT7 AND TOT1 IS 0.997  
DUE TO ONE OR MORE ZERO CELLS IN THEIR BIVARIATE TABLE.  
INFORMATION FROM THESE VARIABLES CAN BE USED TO CREATE ONE NEW VARIABLE.

WARNING: THE SAMPLE CORRELATION OF TOT7 AND TOT2 IS 0.997  
DUE TO ONE OR MORE ZERO CELLS IN THEIR BIVARIATE TABLE.  
INFORMATION FROM THESE VARIABLES CAN BE USED TO CREATE ONE NEW VARIABLE.

WARNING: THE SAMPLE CORRELATION OF TOT7 AND TOT3 IS 0.996  
DUE TO ONE OR MORE ZERO CELLS IN THEIR BIVARIATE TABLE.  
INFORMATION FROM THESE VARIABLES CAN BE USED TO CREATE ONE NEW VARIABLE.

WARNING: THE SAMPLE CORRELATION OF TOT7 AND TOT4 IS 0.996  
DUE TO ONE OR MORE ZERO CELLS IN THEIR BIVARIATE TABLE.  
INFORMATION FROM THESE VARIABLES CAN BE USED TO CREATE ONE NEW VARIABLE.

WARNING: THE SAMPLE CORRELATION OF TOT7 AND TOT5 IS 0.996  
DUE TO ONE OR MORE ZERO CELLS IN THEIR BIVARIATE TABLE.  
INFORMATION FROM THESE VARIABLES CAN BE USED TO CREATE ONE NEW VARIABLE.

WARNING: THE SAMPLE CORRELATION OF TOT7 AND TOT6 IS 0.997  
DUE TO ONE OR MORE ZERO CELLS IN THEIR BIVARIATE TABLE.  
INFORMATION FROM THESE VARIABLES CAN BE USED TO CREATE ONE NEW VARIABLE.

WARNING: THE SAMPLE CORRELATION OF TOT8 AND TOT1 IS 0.997  
DUE TO ONE OR MORE ZERO CELLS IN THEIR BIVARIATE TABLE.  
INFORMATION FROM THESE VARIABLES CAN BE USED TO CREATE ONE NEW VARIABLE.

WARNING: THE SAMPLE CORRELATION OF TOT8 AND TOT2 IS 0.997  
DUE TO ONE OR MORE ZERO CELLS IN THEIR BIVARIATE TABLE.  
INFORMATION FROM THESE VARIABLES CAN BE USED TO CREATE ONE NEW VARIABLE.

WARNING: THE SAMPLE CORRELATION OF TOT8 AND TOT3 IS 0.996  
DUE TO ONE OR MORE ZERO CELLS IN THEIR BIVARIATE TABLE.  
INFORMATION FROM THESE VARIABLES CAN BE USED TO CREATE ONE NEW VARIABLE.

WARNING: THE SAMPLE CORRELATION OF TOT8 AND TOT4 IS 0.997  
DUE TO ONE OR MORE ZERO CELLS IN THEIR BIVARIATE TABLE.  
INFORMATION FROM THESE VARIABLES CAN BE USED TO CREATE ONE NEW VARIABLE.

WARNING: THE SAMPLE CORRELATION OF TOT8 AND TOT5 IS 0.997  
DUE TO ONE OR MORE ZERO CELLS IN THEIR BIVARIATE TABLE.  
INFORMATION FROM THESE VARIABLES CAN BE USED TO CREATE ONE NEW VARIABLE.

WARNING: THE SAMPLE CORRELATION OF TOT8 AND TOT6 IS 0.997  
DUE TO ONE OR MORE ZERO CELLS IN THEIR BIVARIATE TABLE.  
INFORMATION FROM THESE VARIABLES CAN BE USED TO CREATE ONE NEW VARIABLE.

WARNING: THE SAMPLE CORRELATION OF TOT8 AND TOT7 IS 0.998  
DUE TO ONE OR MORE ZERO CELLS IN THEIR BIVARIATE TABLE.  
INFORMATION FROM THESE VARIABLES CAN BE USED TO CREATE ONE NEW VARIABLE.

WARNING: THE SAMPLE CORRELATION OF TOT9 AND TOT1 IS 0.996  
DUE TO ONE OR MORE ZERO CELLS IN THEIR BIVARIATE TABLE.  
INFORMATION FROM THESE VARIABLES CAN BE USED TO CREATE ONE NEW VARIABLE.

WARNING: THE SAMPLE CORRELATION OF TOT9 AND TOT2 IS 0.997  
DUE TO ONE OR MORE ZERO CELLS IN THEIR BIVARIATE TABLE.  
INFORMATION FROM THESE VARIABLES CAN BE USED TO CREATE ONE NEW VARIABLE.

WARNING: THE SAMPLE CORRELATION OF TOT9 AND TOT3 IS 0.996  
DUE TO ONE OR MORE ZERO CELLS IN THEIR BIVARIATE TABLE.  
INFORMATION FROM THESE VARIABLES CAN BE USED TO CREATE ONE NEW VARIABLE.

WARNING: THE SAMPLE CORRELATION OF TOT9 AND TOT4 IS 0.997  
DUE TO ONE OR MORE ZERO CELLS IN THEIR BIVARIATE TABLE.  
INFORMATION FROM THESE VARIABLES CAN BE USED TO CREATE ONE NEW VARIABLE.

WARNING: THE SAMPLE CORRELATION OF TOT9 AND TOT5 IS 0.996  
DUE TO ONE OR MORE ZERO CELLS IN THEIR BIVARIATE TABLE.  
INFORMATION FROM THESE VARIABLES CAN BE USED TO CREATE ONE NEW VARIABLE.

WARNING: THE SAMPLE CORRELATION OF TOT9 AND TOT6 IS 0.997  
DUE TO ONE OR MORE ZERO CELLS IN THEIR BIVARIATE TABLE.  
INFORMATION FROM THESE VARIABLES CAN BE USED TO CREATE ONE NEW VARIABLE.

WARNING: THE SAMPLE CORRELATION OF TOT9 AND TOT7 IS 0.997  
DUE TO ONE OR MORE ZERO CELLS IN THEIR BIVARIATE TABLE.  
INFORMATION FROM THESE VARIABLES CAN BE USED TO CREATE ONE NEW VARIABLE.

WARNING: THE SAMPLE CORRELATION OF TOT9 AND TOT8 IS 0.998  
DUE TO ONE OR MORE ZERO CELLS IN THEIR BIVARIATE TABLE.  
INFORMATION FROM THESE VARIABLES CAN BE USED TO CREATE ONE NEW VARIABLE.

WARNING: THE SAMPLE CORRELATION OF TOT10 AND TOT1 IS 0.997  
DUE TO ONE OR MORE ZERO CELLS IN THEIR BIVARIATE TABLE.  
INFORMATION FROM THESE VARIABLES CAN BE USED TO CREATE ONE NEW VARIABLE.

WARNING: THE SAMPLE CORRELATION OF TOT10 AND TOT2 IS 0.997  
DUE TO ONE OR MORE ZERO CELLS IN THEIR BIVARIATE TABLE.  
INFORMATION FROM THESE VARIABLES CAN BE USED TO CREATE ONE NEW VARIABLE.

WARNING: THE SAMPLE CORRELATION OF TOT10 AND TOT3 IS 0.997  
DUE TO ONE OR MORE ZERO CELLS IN THEIR BIVARIATE TABLE.  
INFORMATION FROM THESE VARIABLES CAN BE USED TO CREATE ONE NEW VARIABLE.

WARNING: THE SAMPLE CORRELATION OF TOT10 AND TOT4 IS 0.997  
DUE TO ONE OR MORE ZERO CELLS IN THEIR BIVARIATE TABLE.

INFORMATION FROM THESE VARIABLES CAN BE USED TO CREATE ONE NEW VARIABLE.

WARNING: THE SAMPLE CORRELATION OF TOT10 AND TOT5 IS 0.996  
DUE TO ONE OR MORE ZERO CELLS IN THEIR BIVARIATE TABLE.  
INFORMATION FROM THESE VARIABLES CAN BE USED TO CREATE ONE NEW VARIABLE.

WARNING: THE SAMPLE CORRELATION OF TOT10 AND TOT6 IS 0.997  
DUE TO ONE OR MORE ZERO CELLS IN THEIR BIVARIATE TABLE.  
INFORMATION FROM THESE VARIABLES CAN BE USED TO CREATE ONE NEW VARIABLE.

WARNING: THE SAMPLE CORRELATION OF TOT10 AND TOT7 IS 0.997  
DUE TO ONE OR MORE ZERO CELLS IN THEIR BIVARIATE TABLE.  
INFORMATION FROM THESE VARIABLES CAN BE USED TO CREATE ONE NEW VARIABLE.

WARNING: THE SAMPLE CORRELATION OF TOT10 AND TOT8 IS 0.997  
DUE TO ONE OR MORE ZERO CELLS IN THEIR BIVARIATE TABLE.  
INFORMATION FROM THESE VARIABLES CAN BE USED TO CREATE ONE NEW VARIABLE.

WARNING: THE SAMPLE CORRELATION OF TOT10 AND TOT9 IS 0.998  
DUE TO ONE OR MORE ZERO CELLS IN THEIR BIVARIATE TABLE.  
INFORMATION FROM THESE VARIABLES CAN BE USED TO CREATE ONE NEW VARIABLE.

WARNING: THE SAMPLE CORRELATION OF TOT11 AND TOT1 IS 0.997  
DUE TO ONE OR MORE ZERO CELLS IN THEIR BIVARIATE TABLE.  
INFORMATION FROM THESE VARIABLES CAN BE USED TO CREATE ONE NEW VARIABLE.

WARNING: THE SAMPLE CORRELATION OF TOT11 AND TOT2 IS 0.998  
DUE TO ONE OR MORE ZERO CELLS IN THEIR BIVARIATE TABLE.  
INFORMATION FROM THESE VARIABLES CAN BE USED TO CREATE ONE NEW VARIABLE.

WARNING: THE SAMPLE CORRELATION OF TOT11 AND TOT3 IS 0.998  
DUE TO ONE OR MORE ZERO CELLS IN THEIR BIVARIATE TABLE.  
INFORMATION FROM THESE VARIABLES CAN BE USED TO CREATE ONE NEW VARIABLE.

WARNING: THE SAMPLE CORRELATION OF TOT11 AND TOT4 IS 0.997  
DUE TO ONE OR MORE ZERO CELLS IN THEIR BIVARIATE TABLE.  
INFORMATION FROM THESE VARIABLES CAN BE USED TO CREATE ONE NEW VARIABLE.

WARNING: THE SAMPLE CORRELATION OF TOT11 AND TOT5 IS 0.997  
DUE TO ONE OR MORE ZERO CELLS IN THEIR BIVARIATE TABLE.  
INFORMATION FROM THESE VARIABLES CAN BE USED TO CREATE ONE NEW VARIABLE.

WARNING: THE SAMPLE CORRELATION OF TOT11 AND TOT6 IS 0.997  
DUE TO ONE OR MORE ZERO CELLS IN THEIR BIVARIATE TABLE.  
INFORMATION FROM THESE VARIABLES CAN BE USED TO CREATE ONE NEW VARIABLE.

WARNING: THE SAMPLE CORRELATION OF TOT11 AND TOT7 IS 0.997  
DUE TO ONE OR MORE ZERO CELLS IN THEIR BIVARIATE TABLE.  
INFORMATION FROM THESE VARIABLES CAN BE USED TO CREATE ONE NEW VARIABLE.

WARNING: THE SAMPLE CORRELATION OF TOT11 AND TOT8 IS 0.997  
DUE TO ONE OR MORE ZERO CELLS IN THEIR BIVARIATE TABLE.  
INFORMATION FROM THESE VARIABLES CAN BE USED TO CREATE ONE NEW VARIABLE.

WARNING: THE SAMPLE CORRELATION OF TOT11 AND TOT9 IS 0.998  
DUE TO ONE OR MORE ZERO CELLS IN THEIR BIVARIATE TABLE.  
INFORMATION FROM THESE VARIABLES CAN BE USED TO CREATE ONE NEW VARIABLE.

WARNING: THE SAMPLE CORRELATION OF TOT11 AND TOT10 IS 0.998  
DUE TO ONE OR MORE ZERO CELLS IN THEIR BIVARIATE TABLE.  
INFORMATION FROM THESE VARIABLES CAN BE USED TO CREATE ONE NEW VARIABLE.

WARNING: THE SAMPLE CORRELATION OF TOT12 AND TOT1 IS 0.997  
DUE TO ONE OR MORE ZERO CELLS IN THEIR BIVARIATE TABLE.  
INFORMATION FROM THESE VARIABLES CAN BE USED TO CREATE ONE NEW VARIABLE.

WARNING: THE SAMPLE CORRELATION OF TOT12 AND TOT2 IS 0.998  
DUE TO ONE OR MORE ZERO CELLS IN THEIR BIVARIATE TABLE.  
INFORMATION FROM THESE VARIABLES CAN BE USED TO CREATE ONE NEW VARIABLE.

WARNING: THE SAMPLE CORRELATION OF TOT12 AND TOT3 IS 0.997  
DUE TO ONE OR MORE ZERO CELLS IN THEIR BIVARIATE TABLE.  
INFORMATION FROM THESE VARIABLES CAN BE USED TO CREATE ONE NEW VARIABLE.

WARNING: THE SAMPLE CORRELATION OF TOT12 AND TOT4 IS 0.997  
DUE TO ONE OR MORE ZERO CELLS IN THEIR BIVARIATE TABLE.  
INFORMATION FROM THESE VARIABLES CAN BE USED TO CREATE ONE NEW VARIABLE.

WARNING: THE SAMPLE CORRELATION OF TOT12 AND TOT5 IS 0.997  
DUE TO ONE OR MORE ZERO CELLS IN THEIR BIVARIATE TABLE.  
INFORMATION FROM THESE VARIABLES CAN BE USED TO CREATE ONE NEW VARIABLE.

WARNING: THE SAMPLE CORRELATION OF TOT12 AND TOT6 IS 0.997  
DUE TO ONE OR MORE ZERO CELLS IN THEIR BIVARIATE TABLE.  
INFORMATION FROM THESE VARIABLES CAN BE USED TO CREATE ONE NEW VARIABLE.

WARNING: THE SAMPLE CORRELATION OF TOT12 AND TOT7 IS 0.997  
DUE TO ONE OR MORE ZERO CELLS IN THEIR BIVARIATE TABLE.  
INFORMATION FROM THESE VARIABLES CAN BE USED TO CREATE ONE NEW VARIABLE.

WARNING: THE SAMPLE CORRELATION OF TOT12 AND TOT8 IS 0.997  
DUE TO ONE OR MORE ZERO CELLS IN THEIR BIVARIATE TABLE.  
INFORMATION FROM THESE VARIABLES CAN BE USED TO CREATE ONE NEW VARIABLE.

WARNING: THE SAMPLE CORRELATION OF TOT12 AND TOT9 IS 0.997  
DUE TO ONE OR MORE ZERO CELLS IN THEIR BIVARIATE TABLE.  
INFORMATION FROM THESE VARIABLES CAN BE USED TO CREATE ONE NEW VARIABLE.

WARNING: THE SAMPLE CORRELATION OF TOT12 AND TOT10 IS 0.998  
DUE TO ONE OR MORE ZERO CELLS IN THEIR BIVARIATE TABLE.  
INFORMATION FROM THESE VARIABLES CAN BE USED TO CREATE ONE NEW VARIABLE.

WARNING: THE SAMPLE CORRELATION OF TOT12 AND TOT11 IS 0.998  
DUE TO ONE OR MORE ZERO CELLS IN THEIR BIVARIATE TABLE.  
INFORMATION FROM THESE VARIABLES CAN BE USED TO CREATE ONE NEW VARIABLE.

WARNING: THE SAMPLE CORRELATION OF TOT13 AND TOT1 IS 0.997  
DUE TO ONE OR MORE ZERO CELLS IN THEIR BIVARIATE TABLE.



INFORMATION FROM THESE VARIABLES CAN BE USED TO CREATE ONE NEW VARIABLE.

WARNING: THE SAMPLE CORRELATION OF TOT13 AND TOT2 IS 0.998  
DUE TO ONE OR MORE ZERO CELLS IN THEIR BIVARIATE TABLE.  
INFORMATION FROM THESE VARIABLES CAN BE USED TO CREATE ONE NEW VARIABLE.

WARNING: THE SAMPLE CORRELATION OF TOT13 AND TOT3 IS 0.997  
DUE TO ONE OR MORE ZERO CELLS IN THEIR BIVARIATE TABLE.  
INFORMATION FROM THESE VARIABLES CAN BE USED TO CREATE ONE NEW VARIABLE.

WARNING: THE SAMPLE CORRELATION OF TOT13 AND TOT4 IS 0.997  
DUE TO ONE OR MORE ZERO CELLS IN THEIR BIVARIATE TABLE.  
INFORMATION FROM THESE VARIABLES CAN BE USED TO CREATE ONE NEW VARIABLE.

WARNING: THE SAMPLE CORRELATION OF TOT13 AND TOT5 IS 0.997  
DUE TO ONE OR MORE ZERO CELLS IN THEIR BIVARIATE TABLE.  
INFORMATION FROM THESE VARIABLES CAN BE USED TO CREATE ONE NEW VARIABLE.

WARNING: THE SAMPLE CORRELATION OF TOT13 AND TOT6 IS 0.997  
DUE TO ONE OR MORE ZERO CELLS IN THEIR BIVARIATE TABLE.  
INFORMATION FROM THESE VARIABLES CAN BE USED TO CREATE ONE NEW VARIABLE.

WARNING: THE SAMPLE CORRELATION OF TOT13 AND TOT7 IS 0.997  
DUE TO ONE OR MORE ZERO CELLS IN THEIR BIVARIATE TABLE.  
INFORMATION FROM THESE VARIABLES CAN BE USED TO CREATE ONE NEW VARIABLE.

WARNING: THE SAMPLE CORRELATION OF TOT13 AND TOT8 IS 0.997  
DUE TO ONE OR MORE ZERO CELLS IN THEIR BIVARIATE TABLE.  
INFORMATION FROM THESE VARIABLES CAN BE USED TO CREATE ONE NEW VARIABLE.

WARNING: THE SAMPLE CORRELATION OF TOT13 AND TOT9 IS 0.998  
DUE TO ONE OR MORE ZERO CELLS IN THEIR BIVARIATE TABLE.  
INFORMATION FROM THESE VARIABLES CAN BE USED TO CREATE ONE NEW VARIABLE.

WARNING: THE SAMPLE CORRELATION OF TOT13 AND TOT10 IS 0.998  
DUE TO ONE OR MORE ZERO CELLS IN THEIR BIVARIATE TABLE.  
INFORMATION FROM THESE VARIABLES CAN BE USED TO CREATE ONE NEW VARIABLE.

WARNING: THE SAMPLE CORRELATION OF TOT13 AND TOT11 IS 0.999  
DUE TO ONE OR MORE ZERO CELLS IN THEIR BIVARIATE TABLE.  
INFORMATION FROM THESE VARIABLES CAN BE USED TO CREATE ONE NEW VARIABLE.

WARNING: THE SAMPLE CORRELATION OF TOT13 AND TOT12 IS 0.999  
DUE TO ONE OR MORE ZERO CELLS IN THEIR BIVARIATE TABLE.  
INFORMATION FROM THESE VARIABLES CAN BE USED TO CREATE ONE NEW VARIABLE.

WARNING: THE SAMPLE CORRELATION OF TOT14 AND TOT1 IS 0.997  
DUE TO ONE OR MORE ZERO CELLS IN THEIR BIVARIATE TABLE.  
INFORMATION FROM THESE VARIABLES CAN BE USED TO CREATE ONE NEW VARIABLE.

WARNING: THE SAMPLE CORRELATION OF TOT14 AND TOT2 IS 0.998  
DUE TO ONE OR MORE ZERO CELLS IN THEIR BIVARIATE TABLE.  
INFORMATION FROM THESE VARIABLES CAN BE USED TO CREATE ONE NEW VARIABLE.

WARNING: THE SAMPLE CORRELATION OF TOT14 AND TOT3 IS 0.997  
DUE TO ONE OR MORE ZERO CELLS IN THEIR BIVARIATE TABLE.  
INFORMATION FROM THESE VARIABLES CAN BE USED TO CREATE ONE NEW VARIABLE.

WARNING: THE SAMPLE CORRELATION OF TOT14 AND TOT4 IS 0.997  
DUE TO ONE OR MORE ZERO CELLS IN THEIR BIVARIATE TABLE.  
INFORMATION FROM THESE VARIABLES CAN BE USED TO CREATE ONE NEW VARIABLE.

WARNING: THE SAMPLE CORRELATION OF TOT14 AND TOT5 IS 0.997  
DUE TO ONE OR MORE ZERO CELLS IN THEIR BIVARIATE TABLE.  
INFORMATION FROM THESE VARIABLES CAN BE USED TO CREATE ONE NEW VARIABLE.

WARNING: THE SAMPLE CORRELATION OF TOT14 AND TOT6 IS 0.997  
DUE TO ONE OR MORE ZERO CELLS IN THEIR BIVARIATE TABLE.  
INFORMATION FROM THESE VARIABLES CAN BE USED TO CREATE ONE NEW VARIABLE.

WARNING: THE SAMPLE CORRELATION OF TOT14 AND TOT7 IS 0.997  
DUE TO ONE OR MORE ZERO CELLS IN THEIR BIVARIATE TABLE.  
INFORMATION FROM THESE VARIABLES CAN BE USED TO CREATE ONE NEW VARIABLE.

WARNING: THE SAMPLE CORRELATION OF TOT14 AND TOT8 IS 0.997  
DUE TO ONE OR MORE ZERO CELLS IN THEIR BIVARIATE TABLE.  
INFORMATION FROM THESE VARIABLES CAN BE USED TO CREATE ONE NEW VARIABLE.

WARNING: THE SAMPLE CORRELATION OF TOT14 AND TOT9 IS 0.998  
DUE TO ONE OR MORE ZERO CELLS IN THEIR BIVARIATE TABLE.  
INFORMATION FROM THESE VARIABLES CAN BE USED TO CREATE ONE NEW VARIABLE.

WARNING: THE SAMPLE CORRELATION OF TOT14 AND TOT10 IS 0.998  
DUE TO ONE OR MORE ZERO CELLS IN THEIR BIVARIATE TABLE.  
INFORMATION FROM THESE VARIABLES CAN BE USED TO CREATE ONE NEW VARIABLE.

WARNING: THE SAMPLE CORRELATION OF TOT14 AND TOT11 IS 0.999  
DUE TO ONE OR MORE ZERO CELLS IN THEIR BIVARIATE TABLE.  
INFORMATION FROM THESE VARIABLES CAN BE USED TO CREATE ONE NEW VARIABLE.

WARNING: THE SAMPLE CORRELATION OF TOT14 AND TOT12 IS 0.999  
DUE TO ONE OR MORE ZERO CELLS IN THEIR BIVARIATE TABLE.  
INFORMATION FROM THESE VARIABLES CAN BE USED TO CREATE ONE NEW VARIABLE.

WARNING: THE SAMPLE CORRELATION OF TOT14 AND TOT13 IS 0.999  
DUE TO ONE OR MORE ZERO CELLS IN THEIR BIVARIATE TABLE.  
INFORMATION FROM THESE VARIABLES CAN BE USED TO CREATE ONE NEW VARIABLE.

WARNING: THE SAMPLE CORRELATION OF TOT15 AND TOT1 IS 0.997  
DUE TO ONE OR MORE ZERO CELLS IN THEIR BIVARIATE TABLE.  
INFORMATION FROM THESE VARIABLES CAN BE USED TO CREATE ONE NEW VARIABLE.

WARNING: THE SAMPLE CORRELATION OF TOT15 AND TOT2 IS 0.997  
DUE TO ONE OR MORE ZERO CELLS IN THEIR BIVARIATE TABLE.  
INFORMATION FROM THESE VARIABLES CAN BE USED TO CREATE ONE NEW VARIABLE.

WARNING: THE SAMPLE CORRELATION OF TOT15 AND TOT3 IS 0.997  
DUE TO ONE OR MORE ZERO CELLS IN THEIR BIVARIATE TABLE.

INFORMATION FROM THESE VARIABLES CAN BE USED TO CREATE ONE NEW VARIABLE.

WARNING: THE SAMPLE CORRELATION OF TOT15 AND TOT4 IS 0.997  
DUE TO ONE OR MORE ZERO CELLS IN THEIR BIVARIATE TABLE.  
INFORMATION FROM THESE VARIABLES CAN BE USED TO CREATE ONE NEW VARIABLE.

WARNING: THE SAMPLE CORRELATION OF TOT15 AND TOT5 IS 0.996  
DUE TO ONE OR MORE ZERO CELLS IN THEIR BIVARIATE TABLE.  
INFORMATION FROM THESE VARIABLES CAN BE USED TO CREATE ONE NEW VARIABLE.

WARNING: THE SAMPLE CORRELATION OF TOT15 AND TOT6 IS 0.997  
DUE TO ONE OR MORE ZERO CELLS IN THEIR BIVARIATE TABLE.  
INFORMATION FROM THESE VARIABLES CAN BE USED TO CREATE ONE NEW VARIABLE.

WARNING: THE SAMPLE CORRELATION OF TOT15 AND TOT7 IS 0.997  
DUE TO ONE OR MORE ZERO CELLS IN THEIR BIVARIATE TABLE.  
INFORMATION FROM THESE VARIABLES CAN BE USED TO CREATE ONE NEW VARIABLE.

WARNING: THE SAMPLE CORRELATION OF TOT15 AND TOT8 IS 0.997  
DUE TO ONE OR MORE ZERO CELLS IN THEIR BIVARIATE TABLE.  
INFORMATION FROM THESE VARIABLES CAN BE USED TO CREATE ONE NEW VARIABLE.

WARNING: THE SAMPLE CORRELATION OF TOT15 AND TOT9 IS 0.997  
DUE TO ONE OR MORE ZERO CELLS IN THEIR BIVARIATE TABLE.  
INFORMATION FROM THESE VARIABLES CAN BE USED TO CREATE ONE NEW VARIABLE.

WARNING: THE SAMPLE CORRELATION OF TOT15 AND TOT10 IS 0.997  
DUE TO ONE OR MORE ZERO CELLS IN THEIR BIVARIATE TABLE.  
INFORMATION FROM THESE VARIABLES CAN BE USED TO CREATE ONE NEW VARIABLE.

WARNING: THE SAMPLE CORRELATION OF TOT15 AND TOT11 IS 0.998  
DUE TO ONE OR MORE ZERO CELLS IN THEIR BIVARIATE TABLE.  
INFORMATION FROM THESE VARIABLES CAN BE USED TO CREATE ONE NEW VARIABLE.

WARNING: THE SAMPLE CORRELATION OF TOT15 AND TOT12 IS 0.998  
DUE TO ONE OR MORE ZERO CELLS IN THEIR BIVARIATE TABLE.  
INFORMATION FROM THESE VARIABLES CAN BE USED TO CREATE ONE NEW VARIABLE.

WARNING: THE SAMPLE CORRELATION OF TOT15 AND TOT13 IS 0.998  
DUE TO ONE OR MORE ZERO CELLS IN THEIR BIVARIATE TABLE.  
INFORMATION FROM THESE VARIABLES CAN BE USED TO CREATE ONE NEW VARIABLE.

WARNING: THE SAMPLE CORRELATION OF TOT15 AND TOT14 IS 0.998  
DUE TO ONE OR MORE ZERO CELLS IN THEIR BIVARIATE TABLE.  
INFORMATION FROM THESE VARIABLES CAN BE USED TO CREATE ONE NEW VARIABLE.

## RESULTS FOR BASIC ANALYSIS

### ESTIMATED SAMPLE STATISTICS

|                             |               |               |               |               |
|-----------------------------|---------------|---------------|---------------|---------------|
| MEANS/INTERCEPTS/THRESHOLDS |               |               |               |               |
| TC1\$1                      | TC1\$2        | TC1\$3        | TC2\$1        | TC2\$2        |
| <u>-1.162</u>               | <u>-0.640</u> | <u>0.584</u>  | <u>-1.389</u> | <u>-0.938</u> |
| MEANS/INTERCEPTS/THRESHOLDS |               |               |               |               |
| TC2\$3                      | TC3\$1        | TC3\$2        | TC3\$3        | TC4\$1        |
| <u>0.294</u>                | <u>-1.619</u> | <u>-1.389</u> | <u>-0.787</u> | <u>-1.406</u> |
| MEANS/INTERCEPTS/THRESHOLDS |               |               |               |               |
| TC4\$2                      | TC4\$3        | TC5\$1        | TC5\$2        | TC5\$3        |
| <u>-0.785</u>               | <u>0.252</u>  | <u>-0.982</u> | <u>-0.257</u> | <u>0.660</u>  |
| MEANS/INTERCEPTS/THRESHOLDS |               |               |               |               |
| TC6\$1                      | TC6\$2        | TC6\$3        | TC7\$1        | TC7\$2        |
| <u>-1.240</u>               | <u>-0.619</u> | <u>0.555</u>  | <u>-1.015</u> | <u>-0.365</u> |
| MEANS/INTERCEPTS/THRESHOLDS |               |               |               |               |
| TC7\$3                      | TC8\$1        | TC8\$2        | TC8\$3        | TC9\$1        |
| <u>0.685</u>                | <u>-1.026</u> | <u>-0.377</u> | <u>0.708</u>  | <u>-1.029</u> |
| MEANS/INTERCEPTS/THRESHOLDS |               |               |               |               |
| TC9\$2                      | TC9\$3        | TC10\$1       | TC10\$2       | TC10\$3       |
| <u>-0.485</u>               | <u>0.564</u>  | <u>-1.133</u> | <u>-0.553</u> | <u>0.501</u>  |
| MEANS/INTERCEPTS/THRESHOLDS |               |               |               |               |
| TC11\$1                     | TC11\$2       | TC11\$3       | TC12\$1       | TC12\$2       |
| <u>-1.338</u>               | <u>-0.866</u> | <u>0.299</u>  | <u>-1.251</u> | <u>-0.681</u> |
| MEANS/INTERCEPTS/THRESHOLDS |               |               |               |               |
| TC12\$3                     | TC13\$1       | TC13\$2       | TC13\$3       | TC14\$1       |
| <u>0.439</u>                | <u>-1.269</u> | <u>-0.740</u> | <u>0.381</u>  | <u>-1.208</u> |
| MEANS/INTERCEPTS/THRESHOLDS |               |               |               |               |
| TC14\$2                     | TC14\$3       | TC15\$1       | TC15\$2       | TC15\$3       |
| <u>-0.698</u>               | <u>0.446</u>  | <u>-1.152</u> | <u>-0.596</u> | <u>0.464</u>  |

|                                                     |               |               |               |               |               |
|-----------------------------------------------------|---------------|---------------|---------------|---------------|---------------|
| MEANS/INTERCEPTS/THRESHOLDS                         |               |               |               |               |               |
|                                                     | TOT1          | TOT2          | TOT3          | TOT4          | TOT5          |
|                                                     | <u>41.655</u> | <u>41.423</u> | <u>40.902</u> | <u>41.447</u> | <u>41.858</u> |
| MEANS/INTERCEPTS/THRESHOLDS                         |               |               |               |               |               |
|                                                     | TOT6          | TOT7          | TOT8          | TOT9          | TOT10         |
|                                                     | <u>41.637</u> | <u>41.817</u> | <u>41.817</u> | <u>41.730</u> | <u>41.662</u> |
| MEANS/INTERCEPTS/THRESHOLDS                         |               |               |               |               |               |
|                                                     | TOT11         | TOT12         | TOT13         | TOT14         | TOT15         |
|                                                     | <u>41.452</u> | <u>41.574</u> | <u>41.531</u> | <u>41.579</u> | <u>41.630</u> |
| CORRELATION MATRIX (WITH VARIANCES ON THE DIAGONAL) |               |               |               |               |               |
|                                                     | TC1           | TC2           | TC3           | TC4           | TC5           |
| TC1                                                 | <u>0.819</u>  |               |               |               |               |
| TC2                                                 | 0.516         | <u>0.669</u>  |               |               |               |
| TC3                                                 | 0.683         | 0.757         | <u>0.646</u>  |               |               |
| TC4                                                 | 0.679         | 0.670         | 0.425         | <u>0.706</u>  |               |
| TC5                                                 | 0.622         | 0.668         | 0.563         | 0.672         | <u>0.664</u>  |
| TC6                                                 | 0.666         | 0.665         | 0.451         | 0.620         | 0.660         |
| TC7                                                 | 0.673         | 0.743         | 0.449         | 0.676         | 0.717         |
| TC8                                                 | 0.666         | 0.716         | 0.531         | 0.665         | 0.673         |
| TC9                                                 | 0.686         | 0.737         | 0.531         | 0.667         | 0.667         |
| TC10                                                | 0.722         | 0.804         | 0.658         | 0.724         | 0.681         |
| TC11                                                | 0.712         | 0.817         | 0.593         | 0.701         | 0.706         |
| TC12                                                | 0.733         | 0.813         | 0.612         | 0.707         | 0.691         |
| TC13                                                | 0.710         | 0.790         | 0.593         | 0.683         | 0.673         |
| TC14                                                | 0.672         | 0.728         | 0.541         | 0.665         | 0.659         |
| TC15                                                | 0.766         | 0.850         | 0.621         | 0.791         | 0.793         |
| TOT1                                                | 0.794         | 0.834         | 0.615         | 0.789         | 0.798         |
| TOT2                                                | 0.803         | 0.857         | 0.568         | 0.787         | 0.798         |
| TOT3                                                | 0.800         | 0.856         | 0.612         | 0.756         | 0.790         |
| TOT4                                                | 0.800         | 0.863         | 0.626         | 0.786         | 0.752         |
| TOT5                                                | 0.806         | 0.863         | 0.618         | 0.791         | 0.794         |
| TOT6                                                | 0.804         | 0.866         | 0.626         | 0.797         | 0.796         |
| TOT7                                                | 0.806         | 0.862         | 0.628         | 0.795         | 0.793         |
| TOT8                                                | 0.807         | 0.866         | 0.623         | 0.797         | 0.798         |
| TOT9                                                | 0.807         | 0.865         | 0.624         | 0.798         | 0.800         |
| TOT10                                               | 0.806         | 0.862         | 0.618         | 0.795         | 0.801         |
| TOT11                                               | 0.807         | 0.861         | 0.622         | 0.798         | 0.799         |
| TOT12                                               | 0.806         | 0.862         | 0.621         | 0.798         | 0.801         |
| TOT13                                               | 0.807         | 0.863         | 0.622         | 0.798         | 0.801         |
| TOT14                                               | 0.807         | 0.865         | 0.624         | 0.797         | 0.799         |
| TOT15                                               |               |               |               |               |               |

| CORRELATION MATRIX (WITH VARIANCES ON THE DIAGONAL) |       |       |       |       |       |
|-----------------------------------------------------|-------|-------|-------|-------|-------|
|                                                     | TC6   | TC7   | TC8   | TC9   | TC10  |
| TC7                                                 | 0.758 |       |       |       |       |
| TC8                                                 | 0.716 | 0.809 |       |       |       |
| TC9                                                 | 0.685 | 0.737 | 0.801 |       |       |
| TC10                                                | 0.712 | 0.765 | 0.781 | 0.834 |       |
| TC11                                                | 0.731 | 0.709 | 0.763 | 0.796 | 0.829 |
| TC12                                                | 0.699 | 0.724 | 0.765 | 0.778 | 0.821 |
| TC13                                                | 0.706 | 0.723 | 0.771 | 0.792 | 0.817 |
| TC14                                                | 0.679 | 0.701 | 0.744 | 0.792 | 0.817 |
| TC15                                                | 0.695 | 0.712 | 0.730 | 0.717 | 0.780 |
| TOT1                                                | 0.804 | 0.828 | 0.867 | 0.866 | 0.886 |
| TOT2                                                | 0.804 | 0.833 | 0.866 | 0.866 | 0.887 |
| TOT3                                                | 0.799 | 0.831 | 0.869 | 0.863 | 0.884 |
| TOT4                                                | 0.799 | 0.831 | 0.866 | 0.865 | 0.886 |
| TOT5                                                | 0.799 | 0.827 | 0.862 | 0.864 | 0.886 |
| TOT6                                                | 0.764 | 0.820 | 0.863 | 0.863 | 0.883 |
| TOT7                                                | 0.793 | 0.791 | 0.856 | 0.861 | 0.880 |
| TOT8                                                | 0.800 | 0.819 | 0.835 | 0.858 | 0.882 |
| TOT9                                                | 0.803 | 0.827 | 0.861 | 0.832 | 0.877 |
| TOT10                                               | 0.802 | 0.826 | 0.865 | 0.856 | 0.858 |
| TOT11                                               | 0.803 | 0.833 | 0.869 | 0.863 | 0.883 |
| TOT12                                               | 0.806 | 0.832 | 0.869 | 0.865 | 0.884 |
| TOT13                                               | 0.806 | 0.833 | 0.869 | 0.865 | 0.885 |
| TOT14                                               | 0.807 | 0.833 | 0.870 | 0.863 | 0.883 |
| TOT15                                               | 0.802 | 0.829 | 0.868 | 0.866 | 0.883 |

| CORRELATION MATRIX (WITH VARIANCES ON THE DIAGONAL) |       |       |       |       |       |
|-----------------------------------------------------|-------|-------|-------|-------|-------|
|                                                     | TC11  | TC12  | TC13  | TC14  | TC15  |
| TC12                                                | 0.870 |       |       |       |       |
| TC13                                                | 0.894 | 0.912 |       |       |       |
| TC14                                                | 0.877 | 0.899 | 0.908 |       |       |
| TC15                                                | 0.818 | 0.824 | 0.842 | 0.828 |       |
| TOT1                                                | 0.906 | 0.910 | 0.918 | 0.902 | 0.864 |
| TOT2                                                | 0.904 | 0.907 | 0.917 | 0.900 | 0.863 |
| TOT3                                                | 0.901 | 0.908 | 0.917 | 0.899 | 0.861 |
| TOT4                                                | 0.904 | 0.910 | 0.919 | 0.902 | 0.863 |
| TOT5                                                | 0.907 | 0.909 | 0.919 | 0.903 | 0.863 |
| TOT6                                                | 0.904 | 0.911 | 0.920 | 0.903 | 0.860 |
| TOT7                                                | 0.907 | 0.910 | 0.921 | 0.903 | 0.861 |
| TOT8                                                | 0.906 | 0.911 | 0.919 | 0.903 | 0.863 |
| TOT9                                                | 0.904 | 0.910 | 0.918 | 0.899 | 0.865 |
| TOT10                                               | 0.902 | 0.908 | 0.917 | 0.898 | 0.860 |
| TOT11                                               | 0.884 | 0.906 | 0.913 | 0.896 | 0.859 |
| TOT12                                               | 0.901 | 0.888 | 0.911 | 0.893 | 0.859 |
| TOT13                                               | 0.900 | 0.902 | 0.898 | 0.893 | 0.858 |
| TOT14                                               | 0.900 | 0.902 | 0.911 | 0.878 | 0.858 |
| TOT15                                               | 0.902 | 0.905 | 0.913 | 0.896 | 0.831 |

CORRELATION MATRIX (WITH VARIANCES ON THE DIAGONAL)

|       | TOT1    | TOT2    | TOT3    | TOT4    | TOT5    |
|-------|---------|---------|---------|---------|---------|
| TOT1  | 116.072 |         |         |         |         |
| TOT2  | 0.998   | 115.784 |         |         |         |
| TOT3  | 0.997   | 0.998   | 122.856 |         |         |
| TOT4  | 0.997   | 0.998   | 0.997   | 116.681 |         |
| TOT5  | 0.997   | 0.997   | 0.996   | 0.997   | 115.307 |
| TOT6  | 0.996   | 0.997   | 0.997   | 0.997   | 0.996   |
| TOT7  | 0.997   | 0.997   | 0.996   | 0.996   | 0.996   |
| TOT8  | 0.997   | 0.997   | 0.996   | 0.997   | 0.997   |
| TOT9  | 0.996   | 0.997   | 0.996   | 0.997   | 0.996   |
| TOT10 | 0.997   | 0.997   | 0.997   | 0.997   | 0.996   |
| TOT11 | 0.997   | 0.998   | 0.998   | 0.997   | 0.997   |
| TOT12 | 0.997   | 0.998   | 0.997   | 0.997   | 0.997   |
| TOT13 | 0.997   | 0.998   | 0.997   | 0.997   | 0.997   |
| TOT14 | 0.997   | 0.998   | 0.997   | 0.997   | 0.997   |
| TOT15 | 0.997   | 0.997   | 0.997   | 0.997   | 0.996   |

CORRELATION MATRIX (WITH VARIANCES ON THE DIAGONAL)

|       | TOT6    | TOT7    | TOT8    | TOT9    | TOT10   |
|-------|---------|---------|---------|---------|---------|
| TOT6  | 116.267 |         |         |         |         |
| TOT7  | 0.997   | 114.857 |         |         |         |
| TOT8  | 0.997   | 0.998   | 114.150 |         |         |
| TOT9  | 0.997   | 0.997   | 0.998   | 113.835 |         |
| TOT10 | 0.997   | 0.997   | 0.997   | 0.998   | 113.624 |
| TOT11 | 0.997   | 0.997   | 0.997   | 0.998   | 0.998   |
| TOT12 | 0.997   | 0.997   | 0.997   | 0.997   | 0.998   |
| TOT13 | 0.997   | 0.997   | 0.997   | 0.998   | 0.998   |
| TOT14 | 0.997   | 0.997   | 0.997   | 0.998   | 0.998   |
| TOT15 | 0.997   | 0.997   | 0.997   | 0.997   | 0.997   |

CORRELATION MATRIX (WITH VARIANCES ON THE DIAGONAL)

|       | TOT11   | TOT12   | TOT13   | TOT14   | TOT15   |
|-------|---------|---------|---------|---------|---------|
| TOT11 | 114.329 |         |         |         |         |
| TOT12 | 0.998   | 113.642 |         |         |         |
| TOT13 | 0.999   | 0.999   | 113.579 |         |         |
| TOT14 | 0.999   | 0.999   | 0.999   | 113.744 |         |
| TOT15 | 0.998   | 0.998   | 0.998   | 0.998   | 114.155 |

STANDARD ERRORS FOR ESTIMATED SAMPLE STATISTICS

S.E. FOR MEANS/INTERCEPTS/THRESHOLDS

| TC1\$1 | TC1\$2 | TC1\$3 | TC2\$1 | TC2\$2 |
|--------|--------|--------|--------|--------|
| 0.041  | 0.035  | 0.034  | 0.046  | 0.038  |

S.E. FOR MEANS/INTERCEPTS/THRESHOLDS

|                                      |              |              |              |              |
|--------------------------------------|--------------|--------------|--------------|--------------|
| TC2\$3                               | TC3\$1       | TC3\$2       | TC3\$3       | TC4\$1       |
| <u>0.033</u>                         | <u>0.053</u> | <u>0.046</u> | <u>0.036</u> | <u>0.047</u> |
| S.E. FOR MEANS/INTERCEPTS/THRESHOLDS |              |              |              |              |
| TC4\$2                               | TC4\$3       | TC5\$1       | TC5\$2       | TC5\$3       |
| <u>0.036</u>                         | <u>0.033</u> | <u>0.039</u> | <u>0.033</u> | <u>0.035</u> |
| S.E. FOR MEANS/INTERCEPTS/THRESHOLDS |              |              |              |              |
| TC6\$1                               | TC6\$2       | TC6\$3       | TC7\$1       | TC7\$2       |
| <u>0.043</u>                         | <u>0.035</u> | <u>0.034</u> | <u>0.039</u> | <u>0.033</u> |
| S.E. FOR MEANS/INTERCEPTS/THRESHOLDS |              |              |              |              |
| TC7\$3                               | TC8\$1       | TC8\$2       | TC8\$3       | TC9\$1       |
| <u>0.035</u>                         | <u>0.039</u> | <u>0.033</u> | <u>0.035</u> | <u>0.039</u> |
| S.E. FOR MEANS/INTERCEPTS/THRESHOLDS |              |              |              |              |
| TC9\$2                               | TC9\$3       | TC10\$1      | TC10\$2      | TC10\$3      |
| <u>0.034</u>                         | <u>0.034</u> | <u>0.041</u> | <u>0.034</u> | <u>0.034</u> |
| S.E. FOR MEANS/INTERCEPTS/THRESHOLDS |              |              |              |              |
| TC11\$1                              | TC11\$2      | TC11\$3      | TC12\$1      | TC12\$2      |
| <u>0.045</u>                         | <u>0.037</u> | <u>0.033</u> | <u>0.043</u> | <u>0.035</u> |
| S.E. FOR MEANS/INTERCEPTS/THRESHOLDS |              |              |              |              |
| TC12\$3                              | TC13\$1      | TC13\$2      | TC13\$3      | TC14\$1      |
| <u>0.033</u>                         | <u>0.044</u> | <u>0.036</u> | <u>0.033</u> | <u>0.042</u> |
| S.E. FOR MEANS/INTERCEPTS/THRESHOLDS |              |              |              |              |
| TC14\$2                              | TC14\$3      | TC15\$1      | TC15\$2      | TC15\$3      |
| <u>0.035</u>                         | <u>0.033</u> | <u>0.041</u> | <u>0.034</u> | <u>0.033</u> |
| S.E. FOR MEANS/INTERCEPTS/THRESHOLDS |              |              |              |              |
| TOT1                                 | TOT2         | TOT3         | TOT4         | TOT5         |
| <u>0.321</u>                         | <u>0.318</u> | <u>0.325</u> | <u>0.321</u> | <u>0.323</u> |
| S.E. FOR MEANS/INTERCEPTS/THRESHOLDS |              |              |              |              |



| TOT6         | TOT7         | TOT8         | TOT9         | TOT10        |
|--------------|--------------|--------------|--------------|--------------|
| <u>0.322</u> | <u>0.322</u> | <u>0.321</u> | <u>0.319</u> | <u>0.318</u> |

S.E. FOR MEANS/INTERCEPTS/THRESHOLDS

| TOT11        | TOT12        | TOT13        | TOT14        | TOT15        |
|--------------|--------------|--------------|--------------|--------------|
| <u>0.316</u> | <u>0.316</u> | <u>0.315</u> | <u>0.316</u> | <u>0.317</u> |

S.E. FOR CORRELATION MATRIX (WITH VARIANCES ON THE DIAGONAL)

|       | TC1     | TC2     | TC3     | TC4     | TC5     |
|-------|---------|---------|---------|---------|---------|
| TC1   | <u></u> | <u></u> | <u></u> | <u></u> | <u></u> |
| TC2   | 0.007   |         |         |         |         |
| TC3   | 0.027   | 0.020   |         |         |         |
| TC4   | 0.013   | 0.010   | 0.021   |         |         |
| TC5   | 0.012   | 0.014   | 0.034   | 0.013   |         |
| TC6   | 0.014   | 0.013   | 0.026   | 0.012   | 0.013   |
| TC7   | 0.013   | 0.014   | 0.034   | 0.015   | 0.013   |
| TC8   | 0.013   | 0.012   | 0.032   | 0.014   | 0.011   |
| TC9   | 0.013   | 0.012   | 0.031   | 0.013   | 0.012   |
| TC10  | 0.012   | 0.011   | 0.029   | 0.013   | 0.013   |
| TC11  | 0.011   | 0.008   | 0.022   | 0.011   | 0.014   |
| TC12  | 0.012   | 0.008   | 0.026   | 0.012   | 0.012   |
| TC13  | 0.011   | 0.008   | 0.024   | 0.012   | 0.013   |
| TC14  | 0.012   | 0.009   | 0.026   | 0.013   | 0.014   |
| TC15  | 0.013   | 0.011   | 0.029   | 0.013   | 0.014   |
| TOT1  | 0.007   | 0.006   | 0.021   | 0.008   | 0.007   |
| TOT2  | 0.007   | 0.006   | 0.022   | 0.008   | 0.007   |
| TOT3  | 0.006   | 0.006   | 0.023   | 0.008   | 0.007   |
| TOT4  | 0.006   | 0.006   | 0.022   | 0.008   | 0.007   |
| TOT5  | 0.006   | 0.005   | 0.021   | 0.008   | 0.009   |
| TOT6  | 0.006   | 0.005   | 0.022   | 0.008   | 0.007   |
| TOT7  | 0.006   | 0.005   | 0.021   | 0.007   | 0.007   |
| TOT8  | 0.006   | 0.006   | 0.021   | 0.007   | 0.007   |
| TOT9  | 0.006   | 0.005   | 0.021   | 0.007   | 0.007   |
| TOT10 | 0.006   | 0.005   | 0.021   | 0.007   | 0.007   |
| TOT11 | 0.006   | 0.006   | 0.022   | 0.008   | 0.007   |
| TOT12 | 0.006   | 0.006   | 0.022   | 0.007   | 0.007   |
| TOT13 | 0.006   | 0.006   | 0.022   | 0.007   | 0.007   |
| TOT14 | 0.006   | 0.006   | 0.022   | 0.007   | 0.007   |
| TOT15 | 0.006   | 0.005   | 0.021   | 0.007   | 0.007   |

S.E. FOR CORRELATION MATRIX (WITH VARIANCES ON THE DIAGONAL)

|      | TC6          | TC7     | TC8     | TC9     | TC10    |
|------|--------------|---------|---------|---------|---------|
| TC7  | <u>0.009</u> | <u></u> | <u></u> | <u></u> | <u></u> |
| TC8  | 0.010        | 0.007   |         |         |         |
| TC9  | 0.012        | 0.010   | 0.008   |         |         |
| TC10 | 0.011        | 0.009   | 0.008   | 0.006   |         |
| TC11 | 0.011        | 0.012   | 0.010   | 0.008   | 0.007   |

|       |       |       |       |       |       |
|-------|-------|-------|-------|-------|-------|
| TC12  | 0.012 | 0.011 | 0.010 | 0.009 | 0.007 |
| TC13  | 0.011 | 0.011 | 0.010 | 0.008 | 0.007 |
| TC14  | 0.012 | 0.012 | 0.010 | 0.008 | 0.007 |
| TC15  | 0.011 | 0.011 | 0.010 | 0.010 | 0.008 |
| TOT1  | 0.007 | 0.006 | 0.005 | 0.005 | 0.004 |
| TOT2  | 0.007 | 0.006 | 0.005 | 0.005 | 0.004 |
| TOT3  | 0.007 | 0.006 | 0.005 | 0.005 | 0.004 |
| TOT4  | 0.007 | 0.006 | 0.005 | 0.005 | 0.004 |
| TOT5  | 0.007 | 0.006 | 0.005 | 0.005 | 0.004 |
| TOT6  | 0.008 | 0.006 | 0.005 | 0.005 | 0.004 |
| TOT7  | 0.007 | 0.007 | 0.005 | 0.005 | 0.005 |
| TOT8  | 0.007 | 0.007 | 0.006 | 0.005 | 0.005 |
| TOT9  | 0.007 | 0.006 | 0.005 | 0.006 | 0.005 |
| TOT10 | 0.007 | 0.006 | 0.005 | 0.005 | 0.005 |
| TOT11 | 0.007 | 0.006 | 0.005 | 0.005 | 0.005 |
| TOT12 | 0.007 | 0.006 | 0.005 | 0.005 | 0.005 |
| TOT13 | 0.007 | 0.006 | 0.005 | 0.005 | 0.005 |
| TOT14 | 0.007 | 0.006 | 0.005 | 0.005 | 0.005 |
| TOT15 | 0.007 | 0.006 | 0.005 | 0.005 | 0.005 |

S.E. FOR CORRELATION MATRIX (WITH VARIANCES ON THE DIAGONAL)

|       | TC11  | TC12  | TC13  | TC14  | TC15  |
|-------|-------|-------|-------|-------|-------|
| TC12  | 0.005 |       |       |       |       |
| TC13  | 0.004 | 0.003 |       |       |       |
| TC14  | 0.005 | 0.004 | 0.004 |       |       |
| TC15  | 0.007 | 0.007 | 0.006 | 0.006 |       |
| TOT1  | 0.003 | 0.004 | 0.004 | 0.004 | 0.005 |
| TOT2  | 0.003 | 0.004 | 0.004 | 0.004 | 0.005 |
| TOT3  | 0.004 | 0.004 | 0.004 | 0.004 | 0.005 |
| TOT4  | 0.003 | 0.004 | 0.003 | 0.004 | 0.005 |
| TOT5  | 0.003 | 0.004 | 0.003 | 0.004 | 0.005 |
| TOT6  | 0.003 | 0.004 | 0.003 | 0.004 | 0.005 |
| TOT7  | 0.003 | 0.004 | 0.004 | 0.004 | 0.005 |
| TOT8  | 0.003 | 0.004 | 0.004 | 0.004 | 0.005 |
| TOT9  | 0.004 | 0.004 | 0.004 | 0.004 | 0.005 |
| TOT10 | 0.004 | 0.004 | 0.004 | 0.004 | 0.005 |
| TOT11 | 0.004 | 0.004 | 0.004 | 0.004 | 0.005 |
| TOT12 | 0.004 | 0.004 | 0.004 | 0.004 | 0.005 |
| TOT13 | 0.004 | 0.004 | 0.004 | 0.004 | 0.005 |
| TOT14 | 0.004 | 0.004 | 0.004 | 0.005 | 0.005 |
| TOT15 | 0.004 | 0.004 | 0.004 | 0.004 | 0.006 |

S.E. FOR CORRELATION MATRIX (WITH VARIANCES ON THE DIAGONAL)

|      | TOT1  | TOT2  | TOT3  | TOT4  | TOT5  |
|------|-------|-------|-------|-------|-------|
| TOT1 | 4.700 |       |       |       |       |
| TOT2 | 0.000 | 4.709 |       |       |       |
| TOT3 | 0.000 | 0.000 | 5.113 |       |       |
| TOT4 | 0.000 | 0.000 | 0.000 | 4.775 |       |
| TOT5 | 0.000 | 0.000 | 0.000 | 0.000 | 4.659 |
| TOT6 | 0.000 | 0.000 | 0.000 | 0.000 | 0.000 |

|       |       |       |       |       |       |
|-------|-------|-------|-------|-------|-------|
| TOT7  | 0.000 | 0.000 | 0.000 | 0.000 | 0.000 |
| TOT8  | 0.000 | 0.000 | 0.000 | 0.000 | 0.000 |
| TOT9  | 0.000 | 0.000 | 0.000 | 0.000 | 0.000 |
| TOT10 | 0.000 | 0.000 | 0.000 | 0.000 | 0.000 |
| TOT11 | 0.000 | 0.000 | 0.000 | 0.000 | 0.000 |
| TOT12 | 0.000 | 0.000 | 0.000 | 0.000 | 0.000 |
| TOT13 | 0.000 | 0.000 | 0.000 | 0.000 | 0.000 |
| TOT14 | 0.000 | 0.000 | 0.000 | 0.000 | 0.000 |
| TOT15 | 0.000 | 0.000 | 0.000 | 0.000 | 0.000 |

S.E. FOR CORRELATION MATRIX (WITH VARIANCES ON THE DIAGONAL)

|       | TOT6  | TOT7  | TOT8  | TOT9  | TOT10 |
|-------|-------|-------|-------|-------|-------|
| TOT6  | 4.752 |       |       |       |       |
| TOT7  | 0.000 | 4.645 |       |       |       |
| TOT8  | 0.000 | 0.000 | 4.592 |       |       |
| TOT9  | 0.000 | 0.000 | 0.000 | 4.566 |       |
| TOT10 | 0.000 | 0.000 | 0.000 | 0.000 | 4.574 |
| TOT11 | 0.000 | 0.000 | 0.000 | 0.000 | 0.000 |
| TOT12 | 0.000 | 0.000 | 0.000 | 0.000 | 0.000 |
| TOT13 | 0.000 | 0.000 | 0.000 | 0.000 | 0.000 |
| TOT14 | 0.000 | 0.000 | 0.000 | 0.000 | 0.000 |
| TOT15 | 0.000 | 0.000 | 0.000 | 0.000 | 0.000 |

S.E. FOR CORRELATION MATRIX (WITH VARIANCES ON THE DIAGONAL)

|       | TOT11 | TOT12 | TOT13 | TOT14 | TOT15 |
|-------|-------|-------|-------|-------|-------|
| TOT11 | 4.628 |       |       |       |       |
| TOT12 | 0.000 | 4.573 |       |       |       |
| TOT13 | 0.000 | 0.000 | 4.565 |       |       |
| TOT14 | 0.000 | 0.000 | 0.000 | 4.575 |       |
| TOT15 | 0.000 | 0.000 | 0.000 | 0.000 | 4.596 |

UNIVARIATE SAMPLE STATISTICS

UNIVARIATE HIGHER-ORDER MOMENT DESCRIPTIVE STATISTICS

| Variable/<br>Percentiles | Mean/<br>Sample Size | Skewness/<br>Kurtosis | Minimum/<br>Maximum | % with<br>Min/Max |         |
|--------------------------|----------------------|-----------------------|---------------------|-------------------|---------|
| 40%/80%                  | Median               |                       |                     |                   | 20%/60% |
| TOT1                     | 41.655               | -0.742                | 14.000              | 3.17%             | 34.000  |
| 41.000                   | 42.000               |                       |                     |                   |         |
|                          | 1516.000             | 116.072               | 0.160               | 56.000            | 10.69%  |
| 52.000                   |                      |                       |                     |                   |         |
| TOT2                     | 41.423               | -0.718                | 14.000              | 3.10%             | 34.000  |
| 41.000                   | 42.000               |                       |                     |                   |         |
|                          | 1516.000             | 115.784               | 0.110               | 56.000            | 9.89%   |
| 52.000                   |                      |                       |                     |                   |         |

|        |          |         |        |        |        |        |
|--------|----------|---------|--------|--------|--------|--------|
| TOT3   |          | 40.902  | -0.676 | 14.000 | 4.29%  | 33.000 |
| 40.000 | 42.000   |         |        |        |        |        |
|        | 1516.000 | 122.856 | -0.019 | 56.000 | 9.83%  | 43.000 |
| 52.000 |          |         |        |        |        |        |
| TOT4   |          | 41.447  | -0.728 | 14.000 | 3.17%  | 33.000 |
| 41.000 | 42.000   |         |        |        |        |        |
|        | 1516.000 | 116.681 | 0.105  | 56.000 | 9.89%  | 44.000 |
| 52.000 |          |         |        |        |        |        |
| TOT5   |          | 41.858  | -0.771 | 14.000 | 3.17%  | 34.000 |
| 42.000 | 42.000   |         |        |        |        |        |
|        | 1516.000 | 115.307 | 0.211  | 56.000 | 10.75% | 44.000 |
| 53.000 |          |         |        |        |        |        |
| TOT6   |          | 41.637  | -0.744 | 14.000 | 3.10%  | 34.000 |
| 41.000 | 42.000   |         |        |        |        |        |
|        | 1516.000 | 116.267 | 0.133  | 56.000 | 10.22% | 44.000 |
| 52.000 |          |         |        |        |        |        |
| TOT7   |          | 41.817  | -0.772 | 14.000 | 3.17%  | 34.000 |
| 41.000 | 42.000   |         |        |        |        |        |
|        | 1516.000 | 114.857 | 0.209  | 56.000 | 10.22% | 44.000 |
| 52.000 |          |         |        |        |        |        |
| TOT8   |          | 41.817  | -0.771 | 14.000 | 3.10%  | 34.000 |
| 41.000 | 42.000   |         |        |        |        |        |
|        | 1516.000 | 114.150 | 0.226  | 56.000 | 10.29% | 44.000 |
| 52.000 |          |         |        |        |        |        |
| TOT9   |          | 41.730  | -0.762 | 14.000 | 3.17%  | 34.000 |
| 41.000 | 42.000   |         |        |        |        |        |
|        | 1516.000 | 113.836 | 0.222  | 56.000 | 10.29% | 44.000 |
| 52.000 |          |         |        |        |        |        |
| TOT10  |          | 41.662  | -0.756 | 14.000 | 3.10%  | 34.000 |
| 41.000 | 42.000   |         |        |        |        |        |
|        | 1516.000 | 113.624 | 0.199  | 56.000 | 9.96%  | 44.000 |
| 52.000 |          |         |        |        |        |        |
| TOT11  |          | 41.452  | -0.721 | 14.000 | 3.10%  | 34.000 |
| 41.000 | 42.000   |         |        |        |        |        |
|        | 1516.000 | 114.329 | 0.130  | 56.000 | 9.83%  | 44.000 |
| 52.000 |          |         |        |        |        |        |
| TOT12  |          | 41.574  | -0.738 | 14.000 | 3.10%  | 34.000 |
| 41.000 | 42.000   |         |        |        |        |        |
|        | 1516.000 | 113.642 | 0.174  | 56.000 | 9.83%  | 44.000 |
| 52.000 |          |         |        |        |        |        |
| TOT13  |          | 41.531  | -0.732 | 14.000 | 3.10%  | 34.000 |
| 41.000 | 42.000   |         |        |        |        |        |
|        | 1516.000 | 113.579 | 0.169  | 56.000 | 9.83%  | 44.000 |
| 52.000 |          |         |        |        |        |        |
| TOT14  |          | 41.579  | -0.735 | 14.000 | 3.10%  | 34.000 |
| 41.000 | 42.000   |         |        |        |        |        |
|        | 1516.000 | 113.744 | 0.172  | 56.000 | 9.89%  | 44.000 |
| 52.000 |          |         |        |        |        |        |
| TOT15  |          | 41.630  | -0.742 | 14.000 | 3.17%  | 34.000 |
| 41.000 | 42.000   |         |        |        |        |        |
|        | 1516.000 | 114.155 | 0.179  | 56.000 | 9.96%  | 44.000 |
| 52.000 |          |         |        |        |        |        |

#### DIAGRAM INFORMATION

Mplus diagrams are currently not available for TYPE=BASIC.  
No diagram output was produced.

Beginning Time: 13:08:48  
Ending Time: 13:08:50  
Elapsed Time: 00:00:02

MUTHEN & MUTHEN  
3463 Stoner Ave.  
Los Angeles, CA 90066

Tel: (310) 391-9971  
Fax: (310) 391-8971  
Web: [www.StatModel.com](http://www.StatModel.com)  
Support: [Support@StatModel.com](mailto:Support@StatModel.com)

Copyright (c) 1998-2019 Muthen & Muthen
